# Supplementary material for: Material diets for Climate-Neutral Buildings
Source: Research Square preprint supplement (doi:10.21203/rs.3.rs-113216/v1), 2021-01-04
Supplement: Supplementary file 2 [file d3153689b904917af07ec18c.docx]

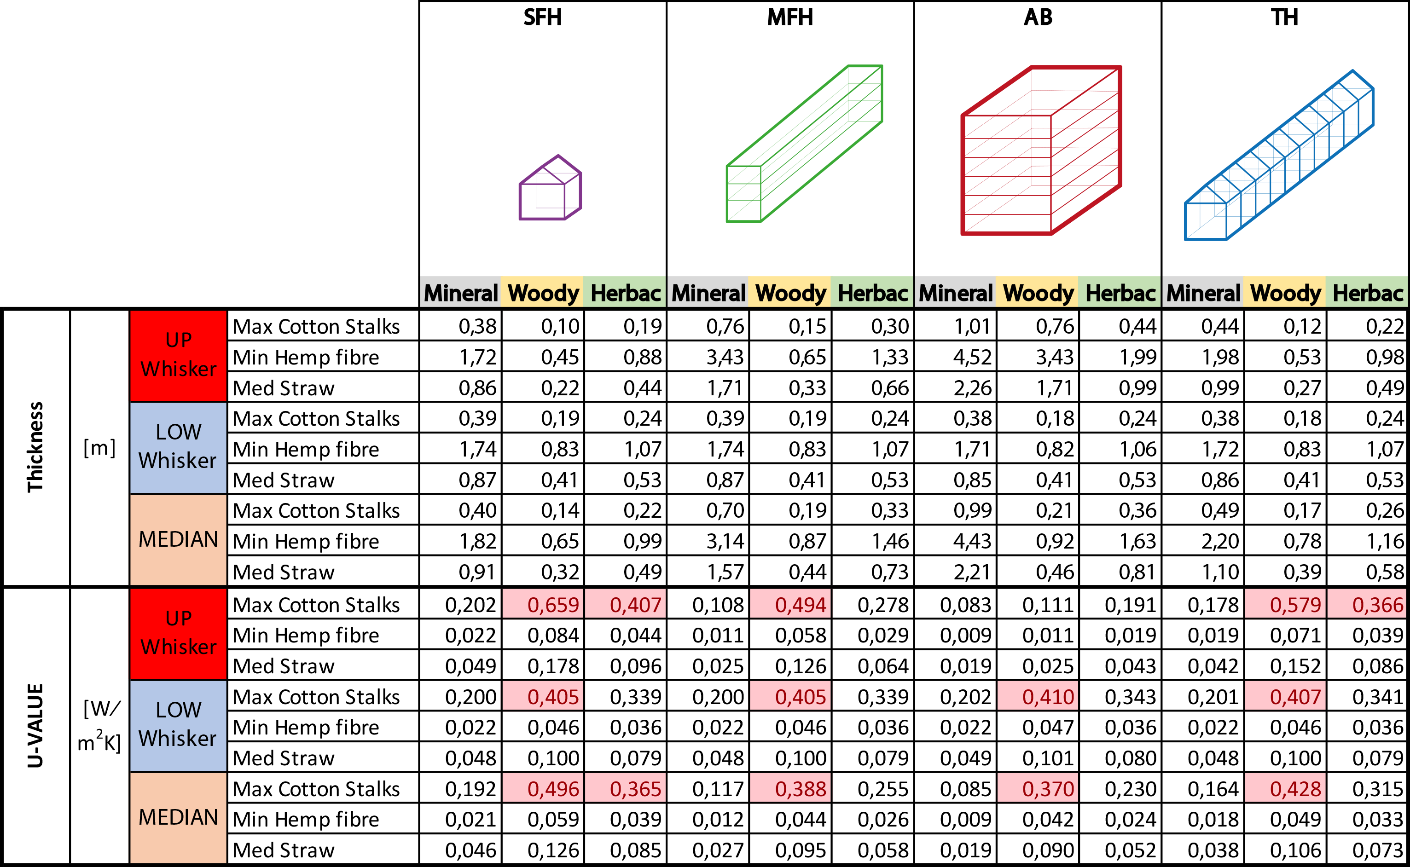


Table 1: Wall thickness for the 3 material diets and related U-value proof for all the geometrical configurations and the four building typologies. Red values represent U-value > 0,35 W/(m2/K), e.g. the average European value
